# Supplementary material for: Sex-based influence of morphological and physical attributes on serve performance in adolescent volleyball players
Source: PeerJ. 2025 Sep 8;13:e19992. doi: 10.7717/peerj.19992 (PMC12424611; doi:10.7717/peerj.19992)
Supplement: Supplemental Information 1 [file peerj-13-19992-s001.xlsx]

## Sheet: Boys
Participants	Chronological Age	PHV	APHV	Height (cm)	Weight (kg)	Arm Length (cm)	Sitting height (cm)	Leg length (cm)	Hand length (cm)	Skinfolds				%MG	BMI	COD (s)	10 m Sprint (s)	Vertical jump (cm)	Upper limb strength (cm)	Hand Grip force (kg)	Agility (s)	5-Jumt (m)	trunk flexibility (cm)		serve accuracy	serve speed km/h
										Triceps	subscapular	Suprailiac	Biceps											Balance (%)
S1	13.5	-1.98256	15.4826	160	48	69	76	84	15	11.5	5.7	8.6	10.7	20.1549	18.75	13.47	3.79	28	3.85	22	13.84	7.71	2	93.254	11	38
S2	12.9	-1.99701	14.897	166	53	76	78	88	17	12.5	7.6	9.2	11.3	21.4861	19.2336	11.51	3.13	36	4.42	26	11.81	9.83	9	97.3485	17	41
S3	13.4	-1.90734	15.3073	164	56	74	77	87	16	11.3	6.6	8.9	10.1	20.2908	20.8209	13.33	2.75	32	4.55	28	13.67	7.69	5	95.4023	14	42
S4	12.2	-2.40125	14.6012	166	43	75	77	89	17	11.9	6.9	8.8	10.6	20.7232	15.6046	12.59	2.51	34	4.88	30	12.73	8.19	8	97.9401	16	45
S5	12.4	-2.20366	14.6037	168	58	76	78	90	19	11.6	6.9	9.5	11.5	21.1419	20.5499	11.1	3.81	38	5.33	32	11.51	10.12	10	95	18	46
S6	13.2	-2.22568	15.4257	160	42	70	75	85	15	11.7	5.9	8.7	10	20.0864	16.4062	13.72	3.12	37	4.22	30	14.12	10.25	5	93.7255	13	39
S7	13	-1.71962	14.7196	169	57	76	80	89	19	11.9	6.3	9.9	12.3	21.4242	19.9573	11	2.1	40	5.56	38	11.45	10.81	10	101.873	18	49
S8	13.8	-1.37583	15.1758	168	50	75	80	88	19	12.1	7.8	9.5	11.2	21.4861	17.7154	11.3	3.73	37	5.5	33	11.51	10.78	10	102.273	18	47
S9	13.6	-2.06531	15.6653	160	45	68	75	85	16	12.3	6.4	9.1	11.4	21.0465	17.5781	12.22	2.62	40	4.11	34	12.71	8.43	2	94.1176	12	38
S10	12.2	-2.28671	14.4867	168	55	77	78	90	20	11.8	7.1	9.9	11.9	21.517	19.487	11.63	2.6	37	5.53	36	11.68	10.34	3	103.148	19	48
S11	13.4	-1.90868	15.3087	165	57	75	77	88	16	12.3	7.3	10.1	12.3	21.9117	20.9366	11.72	2.78	35	4.62	29	12.59	9.58	6	96.0227	15	44
S12	13	-2.18894	15.1889	162	49	70	76	86	15	11.6	5.9	8.9	11	20.4588	18.6709	12.13	2.34	35	4.45	27	13.72	8.8	4	92.4419	12	42
S13	13.3	-1.83158	15.1316	167	52	76	78	89	19	12.2	7.9	9.3	10.4	21.2367	18.6453	11.63	2.36	35	5.48	34	12.47	9.66	11	93.4457	18	47
S14	13.1	-2.03119	15.1312	165	59	76	77	88	16	11.9	8.1	10.3	11.8	21.9416	21.6713	12.2	3.76	34	4.3	27	12.46	8.77	7	94.3182	15	41
S15	13.6	-2.18453	15.7845	158	40	68	74	84	15	11.1	5.8	8.7	10.7	20.0864	16.0231	14.74	2.65	29	4.05	22	14.96	7.4	10	92.2619	10	38
S16	13	-2.3045	15.3045	160	50	69	75	85	15	11.1	6.7	9.8	11.4	20.9825	19.5312	14.17	3.51	28	3.19	23	12.23	7.24	5	95.098	13	39
S17	12.7	-2.31041	15.0104	161	46	69	76	85	15	11.9	7.4	9.9	11.8	21.6091	17.7462	13.51	3.32	32	4.35	24	13.59	7.78	3	98.4314	12	40
S18	12.4	-2.43227	14.8323	163	49	71	76	87	16	11.7	6.8	8.9	10.8	20.7232	18.4425	12.6	3.55	36	4.36	25	12.65	8.33	4	92.9119	13	40
S19	12.5	-2.16376	14.6638	165	54	70	78	87	17	11.4	7.9	10.6	12.1	21.9117	19.8347	11.53	3.77	34	5.49	33	12.34	9.56	6	95.4023	15	47
S20	12.9	-2.22665	15.1267	160	56	69	76	84	15	11.9	7.2	9.9	11.2	21.362	21.875	14.5	3.19	28	4.3	27	14.11	7.43	1	91.8651	10	40
S21	13.1	-2.49688	15.5969	157	54	67	73	84	15	11.1	6.7	9.8	11.4	20.9825	21.9076	13.17	2.61	28	3.32	24	12.23	9.24	6	100.198	16	42
S22	12.8	-2.26984	15.0698	161	45	66	76	85	16	11.9	7.4	9.9	11.8	21.6091	17.3604	11.51	3.22	29	2.7	28	14.24	9	4	99.4118	18	44
S23	12.6	-2.58055	15.1806	163	42	69	74	86	18	11.7	6.8	8.9	10.8	20.7232	15.8079	11.6	2.57	36	3.43	28	12.13	7.33	7	94.7674	14	39
S24	13.4	-1.90896	15.309	165	55	68	77	88	17	11.4	7.9	10.6	12.1	21.9117	20.202	12.53	2.36	34	4.1	22	13.2	6.4	9	94.697	15	48
S25	13.7	-1.42008	15.1201	169	50	70	80	89	16	11.9	7.2	9.9	11.2	21.362	17.5064	14.5	3.11	36	4.11	29	13.21	7.43	6	95.1311	17	41

## Sheet: Girls
Participants	Chrono Age	PHV	APHV	Height (cm)	Weight (kg)	Arm Length (cm)	Sitting height (cm)	Leg length (cm)	Hand length (cm)	Skinfolds				%MG	BMI	COD (s)	10 m Sprint (s)	Vertical jump (cm)	Upper limb strength (cm)	Hand Grip force (kg)	Agility (s)	5-Jumt (m)	trunk flexibility (cm)	Balance (%)	serve accuracy	serve speed (km/h)
										Triceps	Subscapular	suprailiac	Biceps
S1	13.7	-1.74331	15.4433	153	45	66	71	82	15	11.9	9.5	9.4	10.6	25.8685	19.2234	15.22	2.69	23	3.47	23	14.84	6.33	1	67.8862	8	31
S2	13.5	-2.3399	15.8399	156	50	64	73	83	16	12.4	9.1	11.6	10.4	26.4571	20.5457	13.26	2.62	32	3.44	26	12.33	9.15	4	76.9076	10	32
S3	12.1	-2.10815	14.2081	168	52	77	80	88	19	11.5	8.5	10.3	11.8	26.0678	18.424	12.78	2.75	34	4.92	38	11.67	9.33	9	94.3182	17	39
S4	13.2	-2.22525	15.4252	160	45	76	75	85	18	13.8	9.6	11.5	12.9	27.5825	17.5781	12.11	2.51	30	3.65	28	11.51	10.69	7	91.7647	15	33
S5	13.7	-2.50398	16.204	154	55	67	71	83	16	12.9	8.8	8.6	11.8	26.0678	23.1911	13.63	2.89	31	3.8	29	12.51	8.88	6	74.6988	11	33
S6	13.4	-2.14456	15.5446	160	50	75	75	85	17	11.9	8.7	10.4	11.9	26.2917	19.5312	13.91	2.82	30	4.11	33	12.12	6.97	6	87.8431	14	35
S7	13.6	-1.9414	15.5414	160	50	76	76	84	18	11.4	9.2	7.8	9.1	24.6959	19.5312	13.16	2.88	30	4.6	31	12.34	7.62	7	94.6429	15	34
S8	13.8	-1.9794	15.7794	158	49	75	75	83	17	13.8	9.8	9.1	13.2	27.0976	19.6283	14.93	2.93	31	3.6	24	13.32	7.22	7	91.7671	15	31
S9	13.4	-2.2638	15.6638	159	53	74	74	85	17	13.2	8.3	12.1	12.3	27.0976	20.9644	12.85	2.62	32	4	20	11.72	9.56	4	92.1569	13	32
S10	13.1	-1.79596	14.896	168	52	76	79	89	18	12.8	8.4	13.9	11.2	27.2012	18.424	11.19	2.94	36	4.65	39	11.5	10.56	11	91.573	19	38
S11	13.2	-1.99082	15.1908	165	55	77	77	88	19	12.5	8.5	12	12.1	26.8877	20.202	12.8	2.78	33	4.3	36	12.59	7.9	9	94.3182	17	36
S12	13	-2.30493	15.3049	160	47	72	75	85	17	11.6	8.9	11.8	10.3	26.2082	18.3594	12.77	2.34	34	3.61	28	11.7	9.25	11	91.7647	10	33
S13	13.4	-1.90965	15.3097	165	50	75	77	88	18	11.9	9.2	11	11.6	26.5117	18.3655	12.75	2.36	35	4.8	35	11.52	10.66	10	83.7121	18	36
S14	13.2	-1.9878	15.1878	162	52	76	77	85	19	12.1	9.1	11.5	10.4	26.3471	19.8141	13.87	2.38	33	4.57	36	12.46	9.18	8	98.4314	16	37
S15	13	-2.65297	15.653	156	48	73	72	84	17	12.3	9.7	9.7	10.8	26.1802	19.7239	14.8	2.65	26	4.16	31	13.88	8.65	3	91.2698	11	35
S16	13.1	-2.60843	15.7084	153	45	64	72	81	15	12.2	8.1	11.3	11.9	26.4571	19.2234	14.77	3.21	25	3.56	25	13.11	7.45	6	70.3704	9	32
S17	12.5	-2.84201	15.342	155	45	69	72	83	15	11.9	8.9	10.9	11.8	26.4571	18.7305	14.65	3.62	27	3.77	30	12.69	8.2	2	73.0924	11	34
S18	13.4	-2.61081	16.0108	152	50	65	71	81	14	11.8	7.9	11.8	12.5	26.5932	21.6413	14.88	3.85	26	2.96	22	13.52	7.12	5	69.9588	13	30
S19	13	-2.87484	15.8748	150	50	65	70	80	15	12.1	9.9	12.3	12.2	27.2527	22.2222	14.89	3.18	22	3.5	23	14.12	5.7	3	70.2083	11	31
S20	13.3	-2.29741	15.5974	156	48	73	74	82	18	11.8	7.8	12.1	11.9	26.4844	19.7239	13.9	3.15	30	3.62	29	12.52	8.43	8	90.8537	15	33
S21	12.9	-2.91794	15.8179	153	45	64	70	82	16	12.2	8.1	11.3	11.9	26.4571	19.2234	12.51	3.16	26	3.13	28	15.12	6.65	6	78.4553	15	37
S22	12.9	-2.69014	15.5901	155	40	66	72	83	15	11.9	8.9	10.9	11.8	26.4571	16.6493	12.74	3.67	22	2.34	28	14.22	5.16	4	73.0924	12	33
S23	13.6	-2.65901	16.259	152	50	66	70	82	17	11.8	7.9	11.8	12.5	26.5932	21.6413	13.26	3.9	26	2.71	24	15.11	4.96	7	62.8049	13	25
S24	13.9	-2.66636	16.5664	150	50	67	69	81	16	12.1	9.9	12.3	12.2	27.2527	22.2222	14.75	3.16	19	2.5	18	16.9	5.75	5	75.7202	10	28
S25	13.4	-2.50103	15.901	156	48	72	72	84	18	11.8	7.8	12.1	11.9	26.4844	19.7239	13.24	3.11	24	3.14	25	13.67	5.18	8	78.5714	14	30
